# Supplementary material
Source: publisher site journal article supplement (http://content.karger.com/ProdukteDB/miscArchiv/000/200/773/Suppl.pdf)
Supplement: Supplementary file 1 [file Suppl.pdf]

>CulexPipiens-TTLK-CPIJ013746

MTRYQRTTEIRKVT PFDLESLTEILEDWRTL FYLIPRRIGDVDQPPGAY  
LTKYNGNQERDLDKHASQERRCALQLLEEWGSSGKLQDRPTLEHLLKLLV  
KGNMFRAADEVAVNLLKEDPPARPQSGPAARIDIEGLLNGEIERGLDQVS  
YPNSTILLNGMESSTVNNNLDRAEPEKRDDVKDFPDLLRNSMLDGTLSQI  
SLSDNNEQMGEPIVDRPNISALLRSEEPVAGPSGMSQIPVILLGSAISST  
SDSVSNNESSASSVMSQSAEPPPSGLGTISEEGESGDGDQGLPNLSIFGDR  
VPDNVSSSNGIPDLSGLMNGPVSSSHRSEHDSADIPRLSVLGSTQQYSTN  
SNNSDDINSTLASDLIKFSITDSATAEPVHFSYQNLQVATANFNADPFNN  
GDLRKPNGHFLGKGGFGQVCLAVNLT SNIAAAVKRLLPTNENYRQKFDR  
ERQILSQCHHPNIVKLFYSENDQLCLVYEYLPDGT LERALKANREGQTL  
PPTSRLSYLLGIASAIEYLHALPDPVIHRDVTPANILLRGT TAKLADFG  
VKRVESTTATVVAGTAAAYLPVEALRGIVTPALDIYSFGVVIAEVVSGEDA  
IGGVSGGSANVDQDDLLE RVSARDADFIGLVDSRVDGEERWVEGGRRLLE  
LSRRCLRDRTKRPGAKEVRELIEDVANL

>CulexPipiens-Pelle-CPIJ015474

MGTPSASSSFRSNFVYIYDIPWTEQKRLTCLLDQDGKWPPLALKRMGYGA  
VEVEDIQRCCAQSGRSPAEQLLKKWGNLNHTITDLFVVM SQEGLFSAMEI  
IKRFVDPQLHYLIKQESLVAESRKELNGPPAPSAPALEH SKDGNSDSVVP  
PAAFQOKEPAVAPPVVPVAPQPPQVLFSPASIPGGLPQFSYEELRSATD  
NWSKENELGRGGFGIVYKGFKLTHVAIKKIKGINTESARTELRQSFNEL  
KYLNSCRHENVVPLLGCLEQNEPCLVYQLMPGGSLDNRLF PKTTNTRPL  
SMLDRIKIAKGTAKGLQYLHTFTAKPIIHGDIKPGNILLDNNNEPKIGDF  
GLTREL SVSDSSMKVSRVYGT RPYPHEFFTYRQLSTKVDSFSYGLVLYE  
MITGQRVYDDKRPIKHLKDVVDNAIASKYDIRVLM DRALLVVNADDVATV  
QACKVLLTCGVHCTMNDPDRRLEMVEVYKFLMTQFGA

(Misannotated as interleukin-1 receptor-associated kinase 4)

>AedesAegypti-TTLK-AAEL007642

MTPYTRSTEV RKVFELDELASVLEDDWRTL FYLIPRKIADVERPAGSYPI  
RYNGTHESELDDYGRIQNTARARILLEEWGTSGRKGERPTLGHLYTLV DK  
GGMIRAVRHIEKLLKVPESAQPDSGPAAPIDVDLELNRLIEKQLEGIAYP  
SSTALQNGDISITQVNNLDYNLPKRDDVVNPPNTVPDSIEGSLPLLSR  
SDNNDQSIGAVPMLSDLLNADGQDTEASTSDNDSTPRQTIEGNTLSSTSD  
STSESSSNSTPTESLSRILPMVLP TIPEAGEVPNLSIFGPAASEASMDVG  
IPAISALMASSDSQQIVNDVSRSTETTFQSEEHSSSESSSSDSTEQQSSNNE  
PVCASNLMFSSSTNVATVEPLINF SFDLTTATGNFDIKRFSNGNPLQPD  
GRVLGIGGFGEVFLALNLTPTYPVSAVKRLFPTNYKYKEKFDRE RELLSK  
YNHSNIVELIGFSENVTLCLVYEYLPDGT LGAALDKSRKGQLHLTVTRRI  
SYLFGIAAALEYLHSPLVQVVHRDVTLANILLHG DVAKLCDFGLVKRIDS  
ITATEVSGTGPIYSPEAMRGTVTPALDVYSYGVVLAEMVTGEEVLCEVLP  
EGVGDLIERVTARGADLES MVDRKVSQHELSEWLTYGKELLKLSNWCLRE  
RFKRPSAAAVRECVQKMKQGIC

>AedesAegypti-Pelle-AAEL006571

MSAEPSQGRGNTGNPQNVTSDFSSNFKYIYDIPQMEKKRLADLLDQDARW  
VGLALRQMGYSADDVEGIRRCNRSRSPAESLLVKWGNLNHTIVELFVV  
FYRENMTPEMEVIKRYVEPKYHILLKTPVSNTSVKVMNGPPAANGNPVEG  
YTTTDENSENSAQQKVEFAQKVLPPPIAPPVVVPIAPIPLAAPAQFPALMRS  
PSDQIAATVGGGLPQFSGEELREATKNWHPDNELGKGGFGVVYRGYFKQTY  
VAIKKIKGANMESARTELROSLNELKYLNACRHENVVPLLGYSLDCLYQQ  
QHHCASRAKSKSESEFVELTSLNKKPVIHGDIKPGNILLGANNEPKIGD  
FGLTREMAVSDSSMKVSRVYGTRPYIPPEFISQRQLSTKVDSYSYGLVLY  
EIFTGQRVYDDKRVPKHLKAVILAAVQSNADIRNLMDPVLLHTANVRTFP  
SCVMLLRTGLSCTADEPEKRKEMADEVYKSLVEVFGE

>AnophelesGambiae-TTLK

MHRNMEIRHMAFHLETLAHILDTSEGWRDFLYLIPRNLDLLKEDPYYPL  
KYTGLNERPLFDSSILETESQKRNLSPSKLLLEEWGISGQVRPTVDHLLK  
LLVRANQIRAAEYLTLLKEQPPARPKDGPAPIDVTLPEHDHOTESLLNG  
ISYPSSTILLHHVESITIGNNRDYDYLKGPTRVEIKDKSSVNVVDGELPV  
FSSSNNTKSGSDSSDIRNPAMMDRYPDQLPGPSRPSKAAAKAPPAEATP  
DGPLSSNGLPMISALGITSGOPESSKLQNNRNYDCASKEINGPQIPDLSI  
FGREESERKEVNGPQVPELSIFGREESERKEVNGPQVPELSIFGRQSDS  
KEDNGAPVEHREDIPALSALLGDSSDVHQTQSNSTNNTHDSIPMLSMGGS  
DGSTSDTLGSESSSSAIVPQVDESVSDFIKFSTSPVVAVYAYDHLREVD  
GFNVAPYTNNGNLAAPNGRSLGAGGFGAVFLALNLAPSIPVAAVKRLDPDK  
YKREKHFHLELDILSKHSHTNVVSLGSSSDGPQLCLVYEYLDKGNLEAA  
LSLVRAGQROMGATVRLQYLKDIANAVAFHERAKIIHRDVKSANILLDG  
PVAKLCDGFLIKRTSSRTTTSIIGTNAYMAPEAVRGDVSPALDIFAFGIV  
VAETVTGEPVLAEKESRSEIDLAGYVCRQRAEGRDLGLLVDRRAAVGRDG  
EARWCEAGRKLEIAIKCMGEKWSRPNNGALADAVAGIQLVPL

(Misannotated as Tube - AGAP003062-PA; see Materials and Methods)

>AnophelesGambiae-Pelle-AGAP002966

MLCPIMSKPNGQHTEMEGKPSGLSAATTVAPLSNFVYIYDIPRMEKKRLA  
ALLEVNNKWEYELGEKQMGYSTVELDSTQRCCQRNNRSPAQQLDKWGNYN  
HTITELFVVLRSREKLYNCMELIKRYVDSRYHVLIKESASDGRNAVANMAT  
FSGANNANVPNGHRAAHLKDGAAQKVNGGGGDGAAAAAAAAATNDKSN  
PTNSKENSFPANELADLTSLIPKISYEELTAATDNWSEARNILGKGGFGTV  
YRGNFKHTFMIAIKKIDYKVKSSSEAERIQLOQSFNELRFLNSCRHDNIVP  
LFGYICIEKEPCLVYQFMPGGSLDKSLFARRPASPLTWRERMNIAIGTARG  
LQYLHTFGDKPFIHGDIKPGNILLNEYKQPRIGDFGLTRQGAVQDSATVV  
SRVYGTRPYIPKEFYDRRELSTKVDTYSFGVVLYEIGTGLRAWDERRTEK  
HLKDYIARAVQEQMHVTQLADQSLPMDAEALMCCFKLLQVGRVCTADDPK  
QRPDVMVGMWQLSAA

>NasoniaVitripennis-Tube-LOC100122761

MATLDTEIRKLQPIELCTLAHILNQADAWKTLMAAIPSPDNPNHSLFNHE  
HFKMIEQAIRQQRSQAEIFLSEWSTLKGQRPTCRSMLDLLVKAELFRAA  
DYLAVDILKGNPPVRPNFGPAATIDVSENAIEEILKQQAALVKTSAQSTQ  
DQEP LSWSMHFAEKPVHDVTATFHSEKAEDKQEELSDFIKFSETVKSGLL  
KFS DSEVKVQDWIAKDQTEVSEDYVLQEARSEDIPLCVRENVFQEI NSRM  
MSTTTQETETATTIDSSDFSESTIASEEVQLPNISQNVIPVVMEYNEKE  
KGETD

>NasoniaVitripennis-Pelle-LOC100115010

MASSTKSIKFIYQLPYLVERVELCKILNQNNKWEELAGVWGMGFNNLEIQNL  
RKEQNPTTELLAIWEKHNHTVLEL FMLLARMHHYQAMLPKISFVDSKYHT  
LLYNGEGNLQKLLRNGELRKDTKDLKIGAQNFNQKQKQENAAKILVNNS  
LKDESSKILNQPMPHDQONETPSNSNNLLASLPAIFSTLLPRI PYSELAA  
ATDNWKREHLLGKGGFGTVFKGIWKNTTEVAIKKIEPRGSDYDESYALQLE  
QSFREIKILNSLPHENILPLYAYSIGGEAPCLVYQCMKNGSLEDRLHLKH  
GSYPLNWIQRREIAKGIARGLQYLHTIHEKPLIHGDIKSANILLDKNFEP  
KIGDFGLAREGSSDDSLKVSQIQTTRPYLPEEYIFKGNLSTKIDTYSYGI  
VLFELATGLSAYDKSRPTNKKLKEYVDSFEDKDLHLLRDKKAGDKYIEVY  
KYL LLLGKWCSNKLAEHRPQMSTVYDKFKN

(Annotated as similar to ENSANGP00000010886, which is the *A. gambiae* Pelle)

>ApisMellifera-Tube-LOC725368

MMSQSTIYLDIELRKL RPAELYILSQILNISDSWKKLMAIIPNDMPNLP  
KFNSEHFSMIEQAANHQRSAAEIFLSEWATMGKKRPTLSVLLNFLVKAEL  
FRAADYVAKDLLNVKVPERPKYGPATPVDISEEMKLL EEEKEKFENLNFNE  
SLIFKLSSENVDNKTINSVMNDSFLERNIQLTKLISSKEEHSNEQLENK  
KTLNTQMFDLMKFSLEESKECSKQEQMFKEMLSHHELPVFLNEFKQTV EQT  
KLYQEVSS EELPIFVKNAIAINQNL SNYHVDDSLNLSNLNINNEIITTEL  
PQC VVEFHVNNEFNSNNRNN

(this sequence differs from the Genbank record – the Genbank record shows a gap between a.a. 113 and 248; see Materials and Methods)

>ApisMellifera-Pelle-LOC551608

MTSSSCRDKIEYIYQLPFLTRSELCKILNQNDKWEELAGIYMKYDVLTIQ  
TLRKEKNPTDELTLWGHHNHTILEL FVLLSRMQHYQSMLPLIPFVEEKF  
HKLFYNAIHIGVSPSNSNNLLVTS LANPLPVTLSCVPTNKKKDDNVLKPE  
ATIPCVIYNELNIATNEWNKNNILGRGGFGTVYRGTWKNTNVAIKKIEKR  
GTNSDES FVLQQLQTLREIKILNFCRHENILPLYAYSIDKIPCLIIYQLMK  
NGSLEDRLRMRRKSQPLSWIQRHEIAKGTACGLQYLHTIGEKPLIHGDIK  
SANILLDKNFEPRI GDFGLAREGLEND SMKVSQIHTTRPYLPEEFLHERK  
LSTKVD TYSYGIVL FELATGLPVYDESRL ENKFLKDLIGTLENENLVSLM  
DKKADHFLIANAL

(the C-terminus appears to be incomplete)

>TriboliumCasteneum-TTLK-LOC663280

MDPSVEIRKLPLDVRSHLISLLELQDSWKKLMAIIPQTLSSLNEYKCDINF  
NMPAKYRSEHFHIIEDNSVKKRIFCSEILLREWGTSGRVVRPAVGHLKYLL  
QKAELFRAADYVAVDILKEEPPRPAPKGAAPVVFNPDELDPETKRIEK  
ILDEINYPSSAIENINKLNSFNNTLNYSKGKETTQVIPKIIISESPDVEET  
PPFRLPVVQVKVSES DLIKFSQESVSNSDNNANVPHLSLLTDEASNN  
NIPAVISDLVSQSSSETTTENADSAVNRPELSSLLNQSSDDSEPNFNVPA  
ISELSLASSSDSSSNFPALSQ LIDSEKNSRSCSSPLPNLSLNTPLPHFSY  
CDLATATNNFDETPVAQGG RFLGSGAFGKVYLG VGLVSKPVAVKKVILEN  
VDVVRVDDMVTKQFRNEVEILSKYEHENLVALRGYSCDGDYCLLYEYVP  
GGALKDRLQLIWTERLYVAMGTARAIAYLHTAYASPLIHRDVKSANILLD  
SNNKPKVDFGLIKRALNQNTNTATTIFGTSAYMAPEAFRGDVSVKLDTFS  
FGVLLLELLTSMPPMDESREGVDLVTHVQETCQDGIKPLLDTTVGSWMA  
NSINFGEKLYEAIATSCLKEKKERPTMTSICGILGDLVQKFL

(a.a. 1-248 verified through EST sequences, the rest is a prediction from whole genome sequencing reads)

>TriboliumCasteneum-Pelle-LOC654877

MFIYDMPFLERKKLCSILDRNNCFEELA AVHMQFDSETVQKIS  
REFFRGISPTEKLLDLWSHHNHTVFELFILLYRMKHYQAMTILKPLVDSK  
YHHLIKQSTCLPELMADLKLEQEPITSEKILNAPSCENNETKPQKPNGIS  
LISCVTESVGAVPQIPYDDL RQSTNDWNTGSILGRGGFGTVFKGVWKCTQ  
VAIKRIEKKADDNSDQIFQSYTELHCLNAYRHDNILPLYGYSIDGPQHCL  
VYQYMSGGSLEHRLHIRDASRVLSWPTRLTIAIGTARGLQFLHTIRDKPL  
IHGDIKSANILLDLNEIPRIGDFGLAREGPPQTDYVKVSRIHGTRPYLPD  
EFMKYKKFSTKVDYTSFGVVL FELATAGAAYS NKRVNKF LRDHVVFWE GD  
VLQLKDSRAEGGEDFFKGLVEVGKCVRTGAKDRPEMVTVLLQLEAVMNQ

>DaphniaPulex-TTLK

MNSDMEIRKMPITVRLRLSSMLDTNNSWKIVMGAIPELNGDVETKKFSSE  
HVGLIEEEEAKRQKSAFDILIDEWGTSGKQRPTVCELVKLLAELELYQAA  
DYLSTDLLGEGPVERPANGPSANVPSSTEDINFLQTTSHSIQAAILEATN  
EHINPRFFEKKMPFSPPEVDKFDTTLP HLSYADLEYLTNDFDLNPVSQGR  
KLGAGAFGTVFLGILKENPQLDDRGIEIYKKMKLSLQHKVAVKRLHNQKV  
DVDIDTNRLFRTETVETMSQYVHENLLALLAFSADGPDCCLVYSFIPNGSL  
EARLACEGGSPPLQWNQRLDVAHGVSKALIH LHTGGAQPLVHRDVKSANV  
LLDHNMKAKLGD FGLIRIGASGRGSKSVAFTSNVLGTSAYMAPEGAFRGD  
ISVKLDTFSFGV IILELLTGLPPYDEERDGN DLISHVDSALDEIEFIQLL  
DPKISPLPEDMASALHSIALSCIQEKKRRPLMTQV

(assembled from whole genome sequencing reads; a.a. 1-217 and 281-485 verified through EST sequences)

>DaphniaPulex-Pelle

MASASPKPKYIYELPYIPQRDLANILDDNNQWKELGTVHKKINCDFMQYN  
VTRLNEFRNTQSPTMAMFSDWGQKNHTIVELFVLLSKMQHYRALEILMP  
YVDERYHVLVVRNGELNLSKLLKTELGAAAAPGNYSSELSTATLRSPSGAKG  
SVDSCNFNSPPCERAFPSKLAFFELGQNNPSVSKPISINQSDVTRSENIQ  
ASWNTPSPAQPPNPSPQHGPINGILPRRDSESSGIFRDKVLFFALHISIYN  
YSSPAFSEASSASAMSNIPPIDEQELS IATNNWNTVVSILGKGGFGTVYKG  
TWKNTQVAIKRMENKGLAGANLIPMQQSMGELRILNAVRHDNIPLYGYS  
LGGNFPCLVYQFMPNGSLEDRLLCROGTYP LNWEQRFNIARGTARGLQFL  
HTMGDKPLIHGDIKSANILLDKNFEPKIGDFGLAREGPQTQYTHIKVSRV  
LGTRPYLPDEYLRGKKISTKVDYTSFGIVLFELGTGLRAYDSHREHPYLR  
DQIENSGQTDLRDVKAGQVCVALYQPLMHLGWLCSTKAKDRPEMVKV

(assembled from whole genome sequencing reads)

>LottiaGigantea\_TTLK

MGKVTLTQDSYIRKLPFSAYRKLINLLDPGREWEKMAVLVPREINMTADNFEPYDFDQI  
ANFAERGRKHNGSATESILRDWGTQNP TIQHLINVFMEAELFAAADYLSVQILGGSPVPR  
PHTDFMSVENNLGRPHRKVVEDDEDLMLDGVNLPKPNSSKASDNEEMKNSVLRDHNI VLR  
HVSYSTLKSITNNFNEEEEAIKGNLLGKGGFGLVFLGKFQSNFSVAVKQLKKDSQDIDVE  
KQFNTERHYLTKYRQDNLVQLLGF SHDGPYNCL IYQLMTNGSLEDRLMCKDGTSP L TSSQ  
RVIIIVKGTAEGIAFLNNHGLVHRDIKSANVLLDEKFLPKIADFATRSAPQGSGLSKVQQ  
TSCVIGTSAYLAPEAFQYDVSTKLDSFSFGVVL YEILTGLPAYDDQREEKDLKTHMDENC  
EQIVDMLDISGGEWDEKAVNVIYDVAVQCVQNKRRRPVVS D LLEDLRKL

(assembled from whole genome sequencing reads)

>LottiaGigantea-Pelle

MAQIYQGFHFDYISELPYSVTRSIIIVSLDSDKAWECLASEAGYSFDKIKLFELEYQRHH  
GSPAKALLWDWGSRNTPVKELYK LKKINRIRELQILENHLVSVGAIEEQENSHNSYNNS  
IDIMPSLKTSDLPSQKQKIKSDKVALLENEVNFNQPN SQNFGRKKNPTSLCSIDKDKQ  
YDDKVIPGQEQTAAHKPQESEESFESTTSSSFSADLSSSKSSSLTNNSSSQSEDLQSLLT  
NSNMSVAVALMGSPVFKFEELKKSTDNFNEQNLLGEGAFGKVYF SCLRECKCAIKKLDAA  
TSDILSNNEEKRRKLCSELSLLLKYRHENIVTLYGYAVDGP SLCLVYQH MVNGSLED CIQ  
MKNGRLALNWEQRLRILCGAVCGLRYLHYMGNVPLIHGDIKSANILLDKYHEAKIGDLGQ  
AQHVNSGAI TGKLTHTTKDAKSKLYG TKAYLSPELLRGNENMSIKTDIYAFGVVILETL  
SGQPACDENRTSSKFLADYFFDVIEPLGQDEWVDKFDHDKAGPPPTDLIFDILKLAVSCI  
SQIKKRPD TDKVAENLEKNQKFM DVYSSTTSSLGYDHL SHTSVVSGHDGNMAGNMA SV  
SKDSVLKENASPGTPPLESIPYRLQMMYDQQQSGDGPHTSIEDLKKQIQTESKTEEPFKE  
YVSDPAKMAAIENYDKELKLAQQEQPKFEKESE PASDPNKLALLNLFDRKCTISESENS  
NVGSDEHKLKAILFDAQNVGESQSLQNKMVNMFKMYNACIDVEEDDDDDASTLVGDQD  
ENNDDETC DQ

(assembled from whole genome sequencing reads; a.a. 1-367  
verified through EST sequences)

**Supplemental Figure 1.** Annotated FastA Sequences of TTLK Proteins and Pelle-like Kinases.

SUPPLEMENTAL FIGURE 2.

***Drosophila melanogaster* Tube**

|          |         |
|----------|---------|
| NVPNLTIL | 262-269 |
| NIPDLSIL | 286-293 |
| NIPRITLL | 319-326 |
| NLPMISAL | 356-363 |
| NIPDLSEL | 453-460 |

***Culex pipiens* TTLK**

|          |         |
|----------|---------|
| DRPNISAL | 215-222 |
| QIP-VILL | 237-243 |

***Aedes aegypti* TTLK**

|          |         |
|----------|---------|
| EVPNLSIF | 281-288 |
| GIPALSAL | 300-307 |

***Anopheles gambiae* TTLK**

|          |         |                         |
|----------|---------|-------------------------|
| GIPMISAL | 258-265 |                         |
| QIPDLSIF | 294-301 | (RNYDCASKEINGPQIPDLSIF) |
| QVPELSIF | 315-322 | (GREESERKEVNGPQVPELSIF) |
| QVPELSIF | 336-343 | (GREESERKEVNGPQVPELSIF) |
| DIPALSAL | 363-370 |                         |
| SIPMLSML | 391-398 |                         |

***Apis mellifera* Tube**

|          |         |
|----------|---------|
| ELPVFLNE | 235-242 |
| ELPIFVKN | 260-267 |
| ELPQCVVE | 299-306 |

***Tribolium castaneum* TTLK**

|            |         |
|------------|---------|
| NVPHLSSL   | 235-242 |
| NIPAVISDL* | 251-259 |
| NRPELSSL   | 277-284 |
| NVPAISEL   | 297-304 |
| NFPALSQL   | 315-322 |
| PIPNSLN    | 335-342 |

**Supplemental Figure 2.** Alignment of the Tube Repeats from Insect TTLK Proteins. Numbers indicate the location of each repeat in the amino acid sequence. Repeats 2, 3 and 4 in *A. gambiae* TTLK are each part of a longer (21 amino acid) sequence repeat shown in parentheses. The asterisk indicates a *T. castaneum* Tube repeat that contains a one amino acid insertion.
